# Supplementary material
Source: HighWire-hosted journal article supplement (https://heart.bmj.com/content/109/17/1302)
Supplement: inline-supplementary-material-1 [file inline-supplementary-material-1.pdf]

**Supplementary table 1:** Baseline characteristics of global population (Including medical, surgical and percutaneous treatment).

| SUPPLEMENTARY TABLE 1: BASELINE CHARACTERISTICS OF GLOBAL POPULATION (Including medical, surgical and percutaneous treatment)                                                                                                                                                                                                                                                                                                                                                                 |                  |                       |                       |                  |
|-----------------------------------------------------------------------------------------------------------------------------------------------------------------------------------------------------------------------------------------------------------------------------------------------------------------------------------------------------------------------------------------------------------------------------------------------------------------------------------------------|------------------|-----------------------|-----------------------|------------------|
| BASELINE CHARACTERISTICS                                                                                                                                                                                                                                                                                                                                                                                                                                                                      | Total<br>(n=667) | Ostial LCx<br>(n=240) | Ostial LAD<br>(n=427) | <i>p</i>         |
| Age (years), mean±SD                                                                                                                                                                                                                                                                                                                                                                                                                                                                          | 69.1±12.2        | 71.4 ±10.8            | 67.8±12.8             | <b>&lt;0.001</b> |
| Female, n (%)                                                                                                                                                                                                                                                                                                                                                                                                                                                                                 | 165 (24.7)       | 65 (27.1)             | 100 (23.3)            | 0.277            |
| BMI, mean±SD                                                                                                                                                                                                                                                                                                                                                                                                                                                                                  | 27.1±4.9         | 27.7±4.8              | 26.9±4.9              | <b>0.046</b>     |
| CARDIOVASCULAR RISK FACTORS                                                                                                                                                                                                                                                                                                                                                                                                                                                                   |                  |                       |                       |                  |
| Hypertension, n(%)                                                                                                                                                                                                                                                                                                                                                                                                                                                                            | 461 (68.9)       | 182 (75.8)            | 279 (65.0)            | <b>0.004</b>     |
| Dyslipidemia, n(%)                                                                                                                                                                                                                                                                                                                                                                                                                                                                            | 355 (53.1)       | 137 (57.1)            | 218 (50.8)            | 0.119            |
| Diabetes, n(%)                                                                                                                                                                                                                                                                                                                                                                                                                                                                                | 220 (32.9)       | 89 (37.1)             | 131 (30.5)            | 0.084            |
| Smoking history, n(%)                                                                                                                                                                                                                                                                                                                                                                                                                                                                         | 333 (49.9)       | 111 (46.3)            | 222 (52.0)            | 0.155            |
| PREVIOUS HISTORY                                                                                                                                                                                                                                                                                                                                                                                                                                                                              |                  |                       |                       |                  |
| Previous AMI, n(%)                                                                                                                                                                                                                                                                                                                                                                                                                                                                            | 302 (45.2)       | 139 (60.6)            | 163 (38.2)            | <b>&lt;0.001</b> |
| Previous PCI, n(%)                                                                                                                                                                                                                                                                                                                                                                                                                                                                            | 132 (19.7)       | 64 (26.7)             | 68 (15.9)             | <b>0.001</b>     |
| Previous stroke, n(%)                                                                                                                                                                                                                                                                                                                                                                                                                                                                         | 57 (8.5)         | 22 (9.2)              | 35 (8.2)              | 0.654            |
| Peripheral vascular disease, n(%)                                                                                                                                                                                                                                                                                                                                                                                                                                                             | 72 (10.8)        | 26 (10.8)             | 46 (10.7)             | 0.965            |
| CKD, n(%)                                                                                                                                                                                                                                                                                                                                                                                                                                                                                     | 84 (12.6)        | 36 (15.0)             | 48 (11.2)             | 0.154            |
| CLINICAL PRESENTATION AND ANGIOGRAPHIC CHARACTERISTICS                                                                                                                                                                                                                                                                                                                                                                                                                                        |                  |                       |                       |                  |
| Acute coronary syndrome, n(%)                                                                                                                                                                                                                                                                                                                                                                                                                                                                 | 436 (65.3)       | 144 (60.0)            | 292 (68.3)            | <b>0.031</b>     |
| Stable angina, n(%)                                                                                                                                                                                                                                                                                                                                                                                                                                                                           | 288 (43.2)       | 122 (50.8)            | 166 (38.9)            | <b>0.005</b>     |
| Severe multivessel disease, n(%)                                                                                                                                                                                                                                                                                                                                                                                                                                                              | 328 (49.2)       | 139 (57.9)            | 189 (44.3)            | <b>0.001</b>     |
| LCx: left circumflex; LAD: left descending anterior; SD: standard deviation; BMI: body mass index; AMI: acute myocardial infarction; PCI: <b>percutaneous coronary intervention</b> ; CKD: chronic kidney disease.<br># Chi square test was performed to binary data, data expressed by absolute numbers and percentages; Fisher test was performed in cases with n<5 in some group. Student's t-test was performed to quantitative variables, data expressed by mean and standard deviation. |                  |                       |                       |                  |

**Supplementary table 2: standardized mean differences between groups Pre-matching.**

|                                                                                                                                                                                                                                                                                               | <b>LAD (240)</b> | <b>LCx (47)</b> | <b>SMD</b> |
|-----------------------------------------------------------------------------------------------------------------------------------------------------------------------------------------------------------------------------------------------------------------------------------------------|------------------|-----------------|------------|
| <b>Dilated lesion (mean (SD))</b>                                                                                                                                                                                                                                                             | 0.82 (0.39)      | 0.87(0.34)      | 0.146      |
| <b>Sex (mean (SD))</b>                                                                                                                                                                                                                                                                        | 0.24 (0.43)      | 0.17(0.38)      | 0.181      |
| <b>Age (mean (SD))</b>                                                                                                                                                                                                                                                                        | 66.46(13.57)     | 71.13 (12.60)   | 0.357      |
| <b>Body mass index (mean (SD))</b>                                                                                                                                                                                                                                                            | 26.00(4.93)      | 28.50(5.40)     | 0.483      |
| <b>Prior CABG (mean (SD))</b>                                                                                                                                                                                                                                                                 | 0.02(0.14)       | 0.13 (0.34)     | 0.411      |
| <b>Prior MI (mean (SD))</b>                                                                                                                                                                                                                                                                   | 0.21 (0.41)      | 0.47(0.50)      | 0.562      |
| <b>Prior PCI (mean (SD))</b>                                                                                                                                                                                                                                                                  | 0.18 (0.38)      | 0.43(0.50)      | 0.560      |
| <b>Arterial hypertension (mean (SD))</b>                                                                                                                                                                                                                                                      | 0.60(0.49)       | 0.79(0.41)      | 0.420      |
| <b>Hyperlipidaemia (mean (SD))</b>                                                                                                                                                                                                                                                            | 0.46(0.50)       | 0.60(0.50)      | 0.268      |
| <b>Diabetes mellitus (mean (SD))</b>                                                                                                                                                                                                                                                          | 0.21(0.41)       | 0.32(0.47)      | 0.247      |
| <b>Smoking (mean (SD))</b>                                                                                                                                                                                                                                                                    | 0.55(0.50)       | 0.53(0.50)      | 0.045      |
| <b>Peripheral vascular disease (mean (SD))</b>                                                                                                                                                                                                                                                | 0.09(0.28)       | 0.11(0.31)      | 0.061      |
| <b>Prior stroke (mean (SD))</b>                                                                                                                                                                                                                                                               | 0.05(0.21)       | 0.04(0.20)      | 0.018      |
| <b>CKD (mean (SD))</b>                                                                                                                                                                                                                                                                        | 0.08(0.28)       | 0.19(0.40)      | 0.313      |
| <b>Acute coronary syndrome (mean (SD))</b>                                                                                                                                                                                                                                                    | 0.79(0.41)       | 0.68(0.47)      | 0.237      |
| <b>ACS type (mean (SD))</b>                                                                                                                                                                                                                                                                   | 1.06(0.70)       | 0.96(0.78)      | 0.137      |
| <b>Prior PCI with stent (mean (SD))</b>                                                                                                                                                                                                                                                       | 0.92(0.26)       | 0.87(0.34)      | 0.172      |
| <b>Prior 1 lesion PCI (mean (SD))</b>                                                                                                                                                                                                                                                         | 0.62(0.49)       | 0.49(0.51)      | 0.259      |
| <b>Procedural success (mean (SD))</b>                                                                                                                                                                                                                                                         | 0.95(0.22)       | 0.94(0.25)      | 0.057      |
| <b>Prior stent (mean (SD))</b>                                                                                                                                                                                                                                                                | 0.91(0.28)       | 0.96(0.20)      | 0.185      |
| <i>LAD: left anterior descending, LCX: left circumflex, SMD: standardized mean differences, SD: standard deviation, CABG: coronary artery bypass grafting; MI: myocardial infarction; PCI: percutaneous coronary intervention, CKD: chronic kidney disease. ACS: acute coronary syndrome.</i> |                  |                 |            |

**Supplementary table 3: standardized mean differences post-matching.**

|                                                | Means LAD | Means LCx | Std. Mean Diff. | p-value (difference between groups) |
|------------------------------------------------|-----------|-----------|-----------------|-------------------------------------|
| <b>DISTANCE</b>                                | 0.3409    | 0.278     | 0.2466          |                                     |
| <b>Dilated lesion (mean (SD))</b>              | 0.8723    | 0.9787    | -0.3188         | 0.05158                             |
| <b>Sex (mean (SD))</b>                         | 0.1702    | 0.1915    | -0.0566         | 0.7914                              |
| <b>Age (mean (SD))</b>                         | 71.1277   | 73.3404   | -0.1756         | 0.3681                              |
| <b>Body mass index (mean (SD))</b>             | 28.5001   | 28.512    | -0.0022         | 0.9899                              |
| <b>Prior CABG (mean (SD))</b>                  | 0.1277    | 0.0851    | 0.1275          | 0.5087                              |
| <b>Prior MI (mean (SD))</b>                    | 0.4681    | 0.383     | 0.1706          | 0.4095                              |
| <b>Prior PCI (mean (SD))</b>                   | 0.4255    | 0.4255    | 0               | >0.99                               |
| <b>Arterial hypertension (mean (SD))</b>       | 0.7872    | 0.8298    | -0.104          | 0.6047                              |
| <b>Hyperlipidaemia (mean (SD))</b>             | 0.5957    | 0.5319    | 0.1301          | 0.5377                              |
| <b>Diabetes mellitus (mean (SD))</b>           | 0.3191    | 0.3404    | -0.0456         | 0.8286                              |
| <b>Smoking (mean (SD))</b>                     | 0.5319    | 0.5532    | -0.0426         | 0.8381                              |
| <b>Peripheral vascular disease (mean (SD))</b> | 0.1064    | 0.0638    | 0.138           | 0.4652                              |
| <b>Prior stroke (mean (SD))</b>                | 0.0426    | 0.0213    | 0.1054          | 0.5624                              |
| <b>CKD (mean (SD))</b>                         | 0.1915    | 0.1489    | 0.1081          | 0.5878                              |
| <b>Acute coronary syndrome (mean (SD))</b>     | 0.6809    | 0.6809    | 0               | >0.99                               |
| <b>ACS type (mean (SD))</b>                    | 0.9574    | 0.8936    | 0.0819          | 0.6827                              |
| <b>Prior PCI with stent (mean (SD))</b>        | 0.8723    | 0.9149    | -0.1275         | 0.5087                              |
| <b>Prior 1 lesion PCI (mean (SD))</b>          | 0.4894    | 0.5532    | -0.1277         | 0.5407                              |
| <b>Procedural success (mean (SD))</b>          | 0.9362    | 0.9149    | 0.087           | 0.6982                              |
| <b>Prior stent (mean (SD))</b>                 | 0.9574    | 0.9149    | 0.2108          | 0.4044                              |

*LAD: left anterior descending, LCX: left circumflex, Std. Mean Diff.: standardized mean differences, SD: standard deviation, CABG: coronary artery bypass grafting; MI: myocardial infarction; PCI: percutaneous coronary intervention, CKD: chronic kidney disease. ACS: acute coronary syndrome.*

**Supplementary table 4: Differences in bifurcation angle with LMCA according to vessel (LAD vs. LCx)**

| <b>Differences in bifurcation angle with LMCA according to vessel (LAD vs. LCx)</b> |          |                  |              |
|-------------------------------------------------------------------------------------|----------|------------------|--------------|
| <b>P=0.002</b>                                                                      |          |                  |              |
|                                                                                     | <b>n</b> | <b>Mean ± SD</b> | <b>CI95%</b> |
| <b>Angle LAD-LMCA (°)</b>                                                           | 23       | 128.4 ±22.9      | 118.5-138.3  |
| <b>Angle LCx-LMCA (°)</b>                                                           | 34       | 107.5 ±23.5      | 99.3-115.7   |

*LMCA: left main coronary artery; LAD: left anterior descending; LCX: left circumflex; SD: standard deviation; CI: confidence interval.  
#Student's t-test, data expressed by mean and standard deviation.*
